# Supplementary material for: Phosphoinositide 3-Kinase P110δ-Signaling Is Critical for Microbiota-Activated IL-10 Production by B Cells that Regulate Intestinal Inflammation
Source: MDPI journal article supplement (doi:10.3390/cells8101121), 2019-09-21
Supplement: s1 [file s1]

**Table S1. Antibodies used in the present study.**

| Antibody                              | Clone number | Conjugated                              | Brand            |
|---------------------------------------|--------------|-----------------------------------------|------------------|
| anti-mouse B220                       | RA3-6B2      | Pacific Blue                            | Invitrogen       |
| anti-mouse CD11b                      | M1/70        | PE-Cy7                                  | BD Pharmingen    |
| anti-mouse CD11c                      | HL3          | Alexa Fluor 700                         | BD Pharmingen    |
| anti-mouse CD16/CD32                  | 2.4G2        | -                                       | BD Pharmingen    |
| anti-mouse CD19                       | 6D5          | Brilliant Violet 605                    | BioLegend        |
| anti-mouse CD1d                       | 1B1          | PE                                      | eBioscience      |
| anti-mouse CD21                       | 7G6          | Brilliant Violet 650                    | BD Pharmingen    |
| anti-mouse CD23                       | B3B4         | PE                                      | eBioscience      |
| anti-mouse CD24                       | M1/69        | APC                                     | BD Pharmingen    |
| anti-mouse TCR- $\beta$               | H57-597      | Alexa Fluor 700                         | BD Pharmingen    |
| anti-mouse CD3e                       | 145-2C11     | PE-Cy5                                  | eBioscience      |
| anti-mouse CD4                        | RM4-5        | APC                                     | BioLegend        |
| anti-mouse CD45                       | 30-F11       | Pacific Orange                          | Invitrogen       |
| anti-mouse CD5                        | 53-7.3       | PE-Cy5                                  | BD Pharmingen    |
| anti-mouse CD8a                       | 53-6.7       | PE-Cy7                                  | eBioscience      |
| anti-mouse FOXP3                      | FJK-16s      | PE                                      | eBioscience      |
| anti-mouse IgD                        | 11-26c.2a    | APC                                     | BD Pharmingen    |
| anti-mouse IgM                        | II/41        | PE-Cy7                                  | eBioscience      |
| anti-mouse MHC-II                     | M5/114.15.2  | Brilliant Violet 605                    | BioLegend        |
| anti-mouse CD64                       | X54-5/7.1    | PE                                      | BioLegend        |
| anti-mouse Ly6G                       | 1A8          | APC                                     | BioLegend        |
| anti-mouse NK-1.1                     | PK136        | Brilliant Violet 650                    | BD Pharmingen    |
| LIVE/DEAD Fixable Dead Cell Stain Kit | N/A          | Near-IR                                 | Molecular Probes |
| mouse IgG1 $\kappa$                   | MOPC-21      | PE                                      | BioLegend        |
| mouse IgG2a $\kappa$                  | G155-178     | Brilliant Violet 605                    | BD Pharmingen    |
| rat IgG2a $\kappa$                    | R35-95       | APC, PE-Cy5, PE-Cy7                     | BD Pharmingen    |
| rat IgG2a $\kappa$                    | RTK2758      | Brilliant Violet 605, Pacific Blue, APC | BioLegend        |
| rat IgG2a $\kappa$                    | eBR2a        | PE, PE-Cy7                              | eBioscience      |
| rat IgG2b $\kappa$                    | A95-1        | PE-Cy7, APC, Pacific Orange             | BD Pharmingen    |
| rat IgG2b $\kappa$                    | R35-38       | Brilliant Violet 650, PE,               | BD Pharmingen    |
| hamster IgG1 $\lambda$ 2              | A19-3        | Alexa Fluor 700                         | BD Pharmingen    |
| hamster IgG2 $\lambda$ 1              | Ha4/8        | Alexa Fluor 700                         | BD Pharmingen    |
| hamster IgG                           | eBio299Am    | PE-Cy5                                  | eBioscience      |
| anti-mouse CD3e                       | R35-95       | -                                       | R&D systems      |
| anti-mouse CD28                       | 794716       | -                                       | R&D systems      |
| anti-mouse CD210 (IL-10R)             | 1B1.3a       | -                                       | BD Pharmingen    |
| rat IgG1 $\kappa$                     | R3-34        | -                                       | BD Pharmingen    |
| mouse IgG1 $\kappa$                   | MOPC-21      | -                                       | BioLegend        |

**Figure S1**

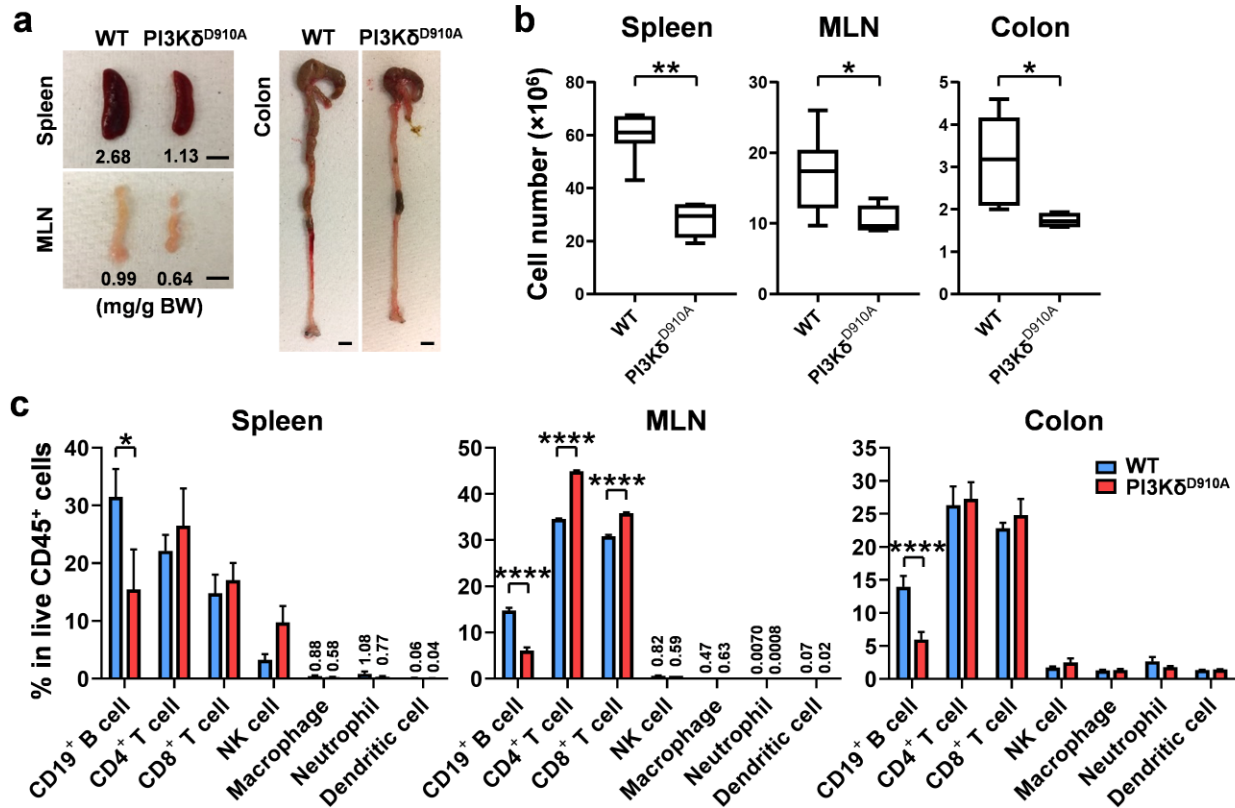

**Figure S1. B cell population is significantly reduced in PI3K $\delta^{D910A}$  mice.** (a) Representative spleen, mesenteric lymph node (MLN), and colon tissues from 8-10 week-age male WT and PI3K $\delta^{D910A}$  mice. Bar indicates 0.5 cm. Number indicates tissue weight (mg) per body weight (g). (b) Cell numbers of spleen cells, MLN cells, and colonic lamina propria (cLP) cells of 8-10 week-age WT and PI3K $\delta^{D910A}$  mice. Mean  $\pm$  range. N=4-5/group. (c) The percentages of B cells (B220<sup>+</sup>CD19<sup>+</sup>), CD4<sup>+</sup> T cells (TCR $\beta^{+}$ CD3<sup>+</sup>CD4<sup>+</sup>CD8<sup>neg</sup>), CD8<sup>+</sup> T cells (TCR $\beta^{+}$ CD3<sup>+</sup>CD4<sup>neg</sup>CD8<sup>+</sup>), natural killer (NK) cells (TCR $\beta^{neg}$ NK1.1<sup>+</sup>), macrophages (TCR $\beta^{neg}$ CD11b<sup>+</sup>CD64<sup>+</sup>), neutrophils (TCR $\beta^{neg}$ MHCII<sup>neg</sup>Ly6G<sup>+</sup>) and dendritic cells (TCR $\beta^{neg}$ CD64<sup>neg</sup>MHCII<sup>+</sup>CD11c<sup>+</sup>) in singlet live CD45<sup>+</sup> spleen cells, MLN cells or cLP cells of 8-10 week-age WT or PI3K $\delta^{D910A}$  mice. Blue bar (left) and red bar (right) indicate WT and PI3K $\delta^{D910A}$  respectively. Mean  $\pm$  SEM. N=4-5/group. Mann-Whitney unpaired two-tailed test was used. \* $p$  < 0.05, \*\* $p$  < 0.01, \*\*\*\* $p$  < 0.0001.

**Figure S2**

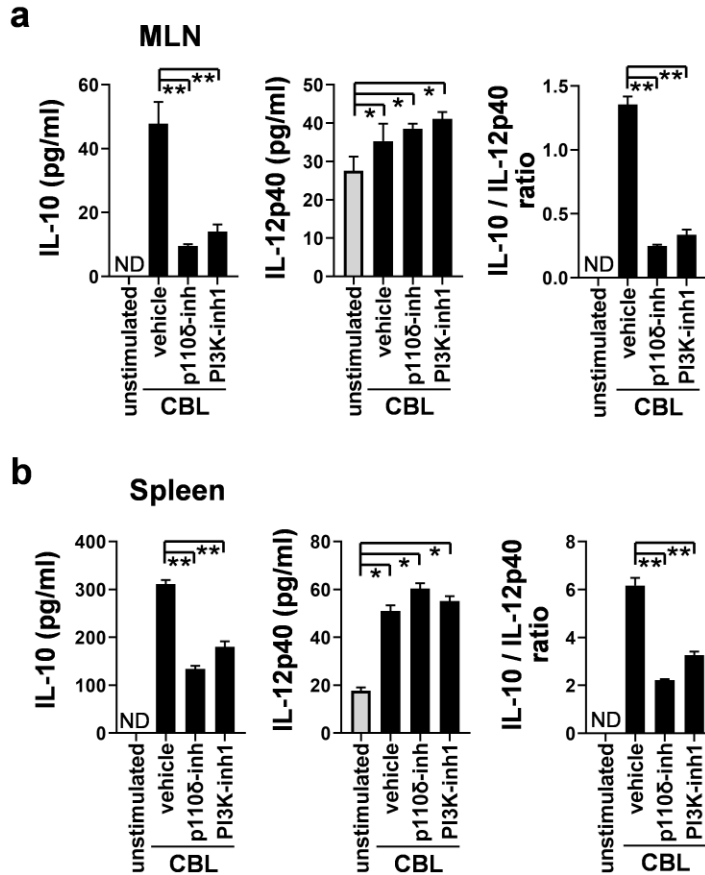

**Figure S2. The inflammatory or regulatory phenotypes of MLN and spleen cells are determined by PI3K $\delta$  signaling.** (a, b)  $1 \times 10^6$  unfractionated MLN cells (a), or spleen cells (b) from WT mice were cultured with or without CBL (10  $\mu$ g/ml) in the absence or presence of several PI3K-related inhibitors in complete medium in 96-well plates for 24 hours. Supernatant levels of IL-10 and IL-12p40 were measured by ELISA. PI3K-related inhibitors included: PI3Kp110 $\delta$ -selective inhibitor (p110 $\delta$ -inh, IC87114, 2  $\mu$ M) and PI3K-global inhibitor (PI3K-inh1: LY294002, 2  $\mu$ M). Vehicle control: dimethyl sulfoxide. N=4-5/group. Mean  $\pm$  SEM. Dunn's multiple comparisons test following one-way ANOVA was used. \* $p$  < 0.05, \*\* $p$  < 0.01. ND indicates not detected.

**Figure S3**

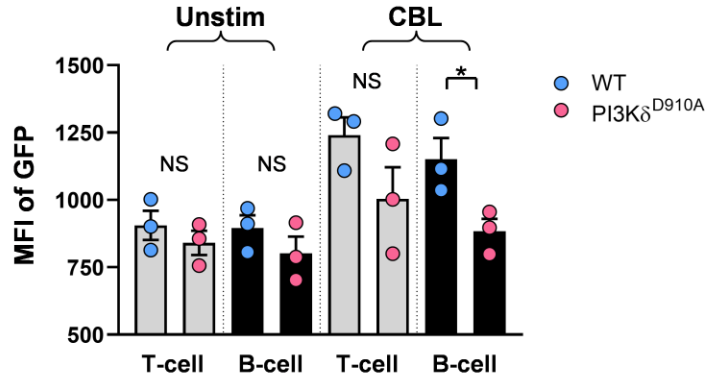

**Figure S3. The median fluorescence intensities of GFP in T cells and B cells.**  $1 \times 10^6$  unfractionated MLN cells from 8-10 week-age WT; *Il10<sup>eGFP</sup>* or PI3K $\delta$ <sup>D910A</sup> mice were cultured with medium alone (unstim) or CBL (10  $\mu$ g/ml) in complete medium for 24 hours at 37°C with 5% CO<sub>2</sub>. The percentages of GFP<sup>+</sup> T cells (CD45<sup>+</sup>TCR $\beta$ <sup>+</sup>CD3<sup>+</sup>) and B cells (CD45<sup>+</sup>B220<sup>+</sup>CD19<sup>+</sup>) in MLN cells (CD45<sup>+</sup>) stimulated with CBL are shown. The median fluorescence intensities (MFI) of GFP in GFP<sup>+</sup> T cells and B cells in MLN cells (CD45<sup>+</sup>) stimulated with CBL are shown. Mean  $\pm$  SEM. Mann-Whitney unpaired one-tailed test was used. \* $p < 0.05$ . NS indicates not significant.

**Figure S4**

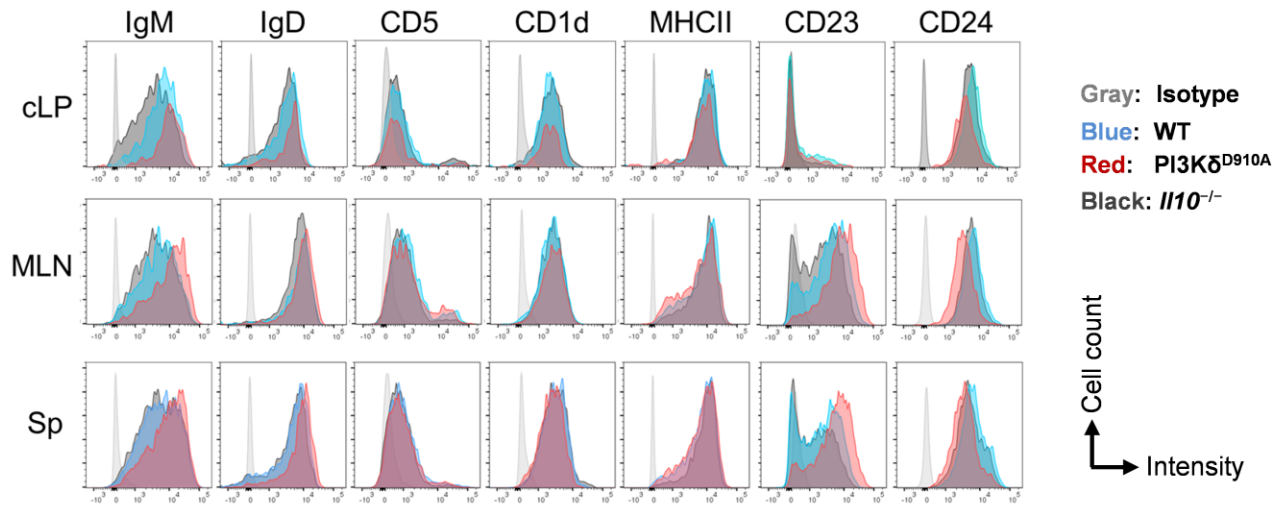

**Figure S4. Phenotypic characteristics of B cells in  $PI3K\delta^{D910A}$  mice.** Colonic lamina propria (cLP), mesenteric lymph node (MLN), or spleen (Sp) cells were isolated from 8-10 week-age normal  $PI3K\delta$  (WT);  $I110^{eGFP}$ ,  $PI3K\delta^{D910A}$ ;  $I110^{eGFP}$ ,  $I110^{-/-}$  mice. The singlet live B cell populations (Live/Dead<sup>neg</sup>CD45<sup>+</sup>B220<sup>+</sup>CD19<sup>+</sup>) were analyzed by flow cytometry with the following phenotypic markers: IgM (PE-Cy7), IgD (APC), CD5 (PE-Cy5), CD1d (PE), MHC-II (Brilliant Violet 650), CD23 (PE), and CD24 (APC). Representative histograms of B cells are shown. Gray: isotype control, Blue: WT, Red:  $PI3K\delta^{D910A}$ , Black:  $I110^{-/-}$ .

**Figure S5**

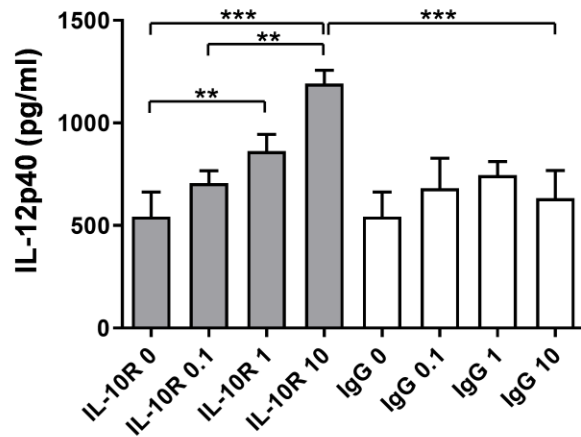

**Figure S5. Blockade of IL-10 signaling increases IL-12p40 secretion by B cells.** Unfractionated WT splenic B cells were cultured in the presence of indicated concentrations (0-10 ng/ml) of anti-IL-10 receptor antibody (IL-10R) or isotype control antibody (IgG) with 500 nM CpG-DNA stimulation for 72 hours. IL-12p40 supernatant level was determined by ELISA. Mean  $\pm$  SEM, triplicates. N=4-5/group. Dunn's multiple comparisons test following one-way ANOVA was used.  $**p < 0.01$ ,  $***p < 0.001$ .
